# Supplementary material
Source: PubMed Central journal article supplement (PMC2777823)
Supplement: 90834.2008_1.pdf [file 90834.2008_1.pdf]

# 1 Supplementary Materials

2

## 3 **Estimation of trial-to-trial generalization under noise influence**

4

5 Here we provide supplementary simulation results for evaluating the performance of the  
6 parameter estimation method (the prediction-error method) in the presence of process and  
7 observation noises. Because human adaptation processes are inherently noisy, it is necessary to  
8 assess how robust the estimation method is. Noise terms are included to the single-state  
9 state-space model as

$$10 \quad \begin{cases} \Phi_{k+1} = \Phi_k + BH_k^T \Delta\phi_k + w_k \\ \phi_k = H_k \Phi_k + v_k \end{cases} \quad (S1)$$

11 where  $w$  and  $v$  are process and observation noises with zero means and covariances

12  $\sigma_{proc}^2 \cdot I$  and  $\sigma_{obs}^2$ , respectively. Using various representative values of  $\sigma_{proc}$  and  $\sigma_{obs}$ , the  
13 state-space model generated 200 independent realizations of artificial error data for randomized  
14 target orders. In the simulations shown below three values of generalization widths ( $1^\circ$ ,  $30^\circ$   
15 and  $60^\circ$ ) were used to define the matrix  $B$  as in Fig.1 of the main text. The prediction-error  
16 method was then applied to the artificial error data to estimate the eight parameters of  $B$  matrix.

17

18 First, we examined the individual effect of process and observation noises separately ( $(\sigma_{proc},$   
19  $\sigma_{obs})=(0.4, 0.0)$  in Fig.S1 and  $(\sigma_{proc}, \sigma_{obs})=(0.0, 3.0)$  in Fig.S2). The simulation results  
20 demonstrate that the prediction-error method essentially reproduced the shape of generalization  
21 functions. Note that we needed to use a smaller value of  $\sigma_{proc}$  than that of  $\sigma_{obs}$  because the  
22 process noise has an accumulative influence over error time courses. Next, we investigated the  
23 combined effects of process and observation noises ( $(\sigma_{proc}, \sigma_{obs})=(0.2, 2.)$  in Fig.S3,  $(\sigma_{proc},$   
24  $\sigma_{obs})=(0.4, 2.)$  in Fig.S4, and  $(\sigma_{proc}, \sigma_{obs})=(0.2, 4.)$  in Fig.S1). Again, the prediction-error method  
25 could recover the generalization functions reasonably well.

26

27 Besides the simulation results demonstrated above, various combinations of noise levels and  
28 generalization function width were tested and confirmed that the prediction-error method was  
29 reasonably robust for a wide range of noise values. To conclude, the above numerical results  
30 guarantee that the prediction-error method is able to reliably reproduce the generalization width  
31 for a variety of process and observation noise strengths and may safely be applied to human

32 psychophysical error data.

33

34

35 **Fitting of the state-space model to individual data**

36

37 Fig S6 shows three individual error data together with the state-space model fitting (left column) and  
38 the derived individual trial-to-trial generalization functions (right column), using the same format of  
39 Fig. 6A and 6B. Each  $R^2$  value of fitness is included below the trial-to-trial error data. Each  
40 generalization function, though noisy, exhibits essentially a narrow single-peaked shape that was  
41 found in the group average (Fig. 6B).

42

43  
44  
45

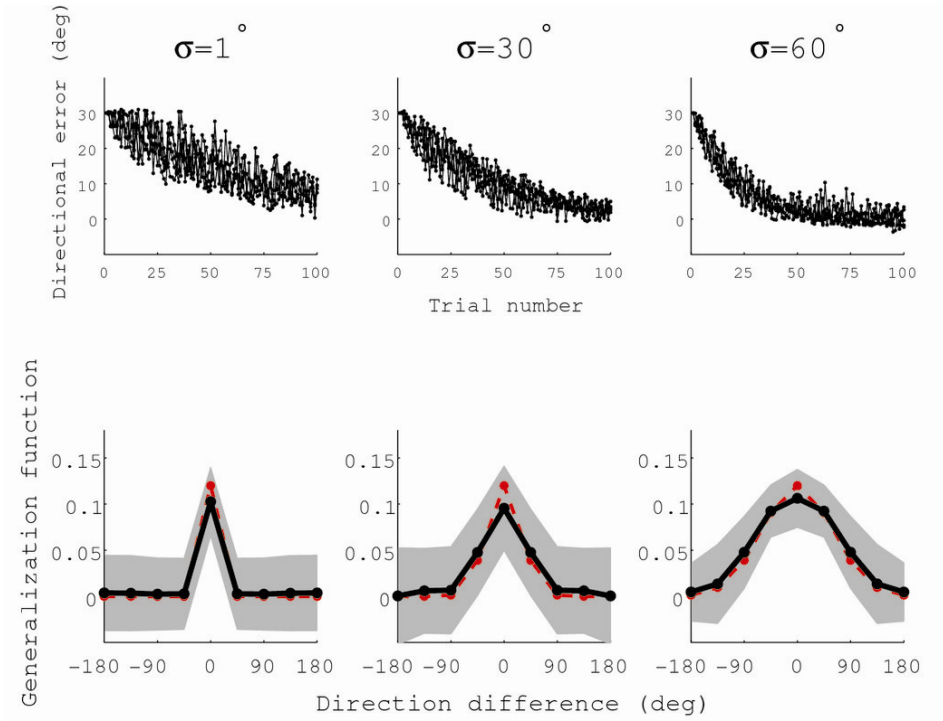

Figure S1: Estimation of generalization functions using the least-squares method. Left, middle, right columns are for generalization widths  $\sigma = 1^\circ, 30^\circ, 60^\circ$ . Panels in top rows are five typical error time courses, and panels in bottom are estimated generalization functions. Red dash lines represent true values.  $\sigma_{proc} = 0.4$  and  $\sigma_{obs} = 0$ .

46  
47  
48

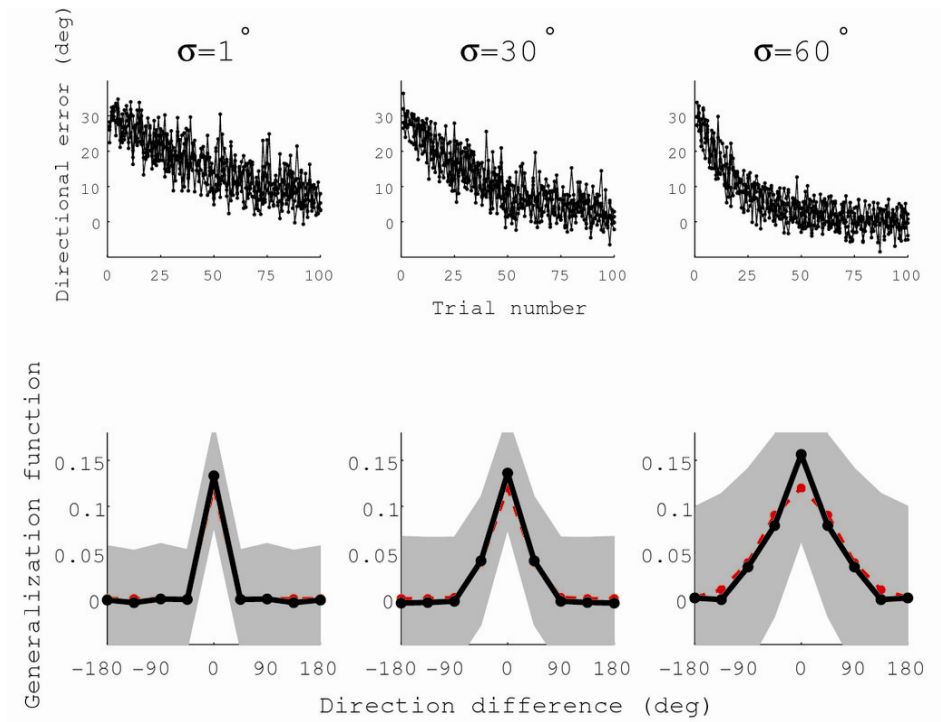

Figure S2:  $\sigma_{proc} = 0.0$  and  $\sigma_{obs} = 3.0$ .

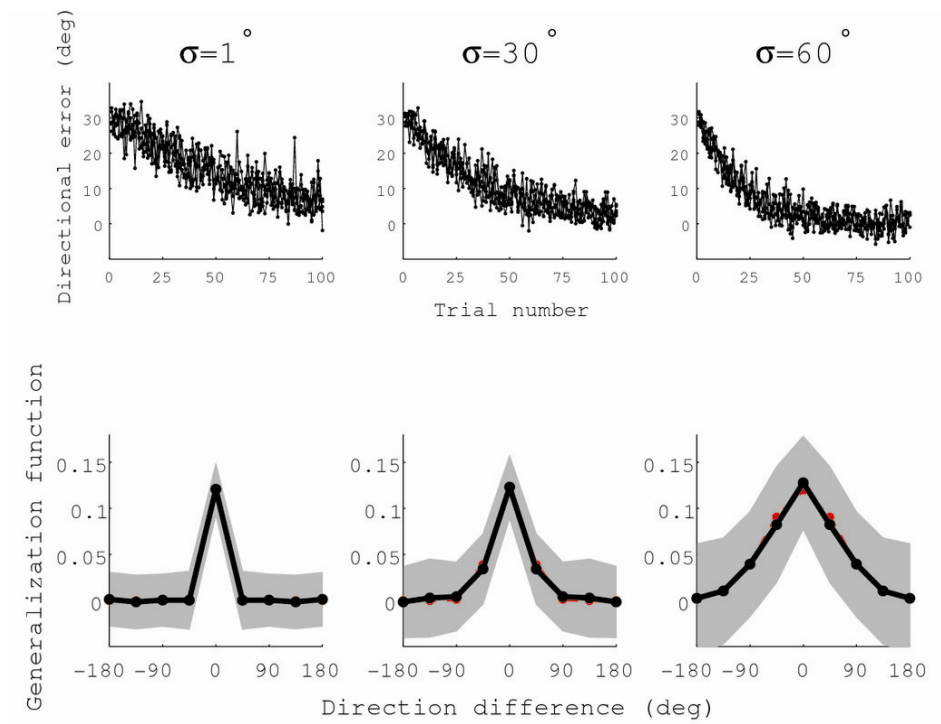

Figure S3:  $\sigma_{proc} = 0.2$  and  $\sigma_{obs} = 2.0$ .

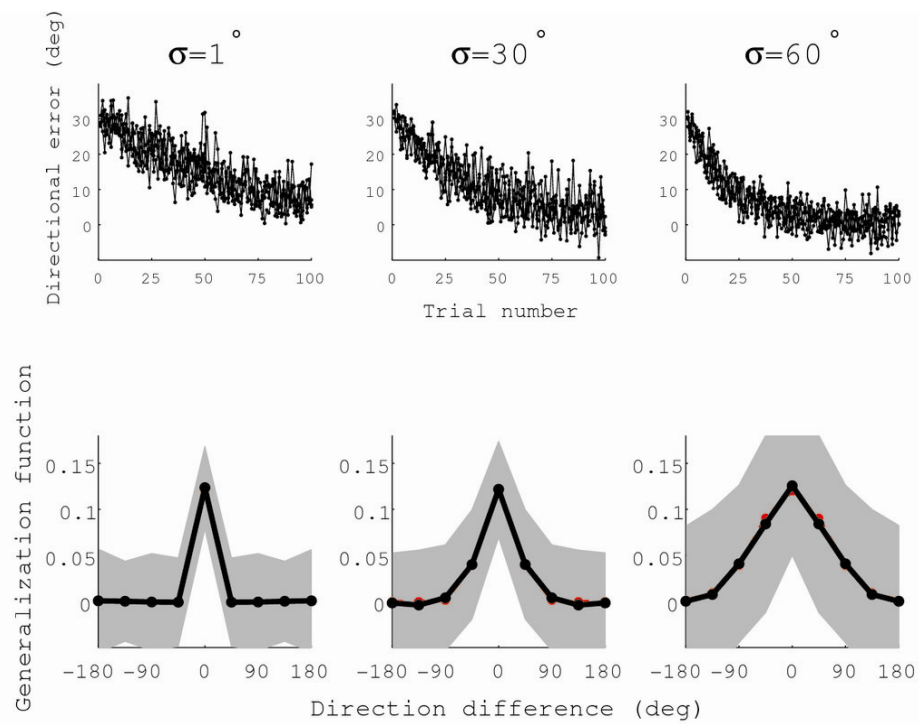

49

50

51

Figure S4:  $\sigma_{proc} = 0.4$  and  $\sigma_{obs} = 2.0$ .

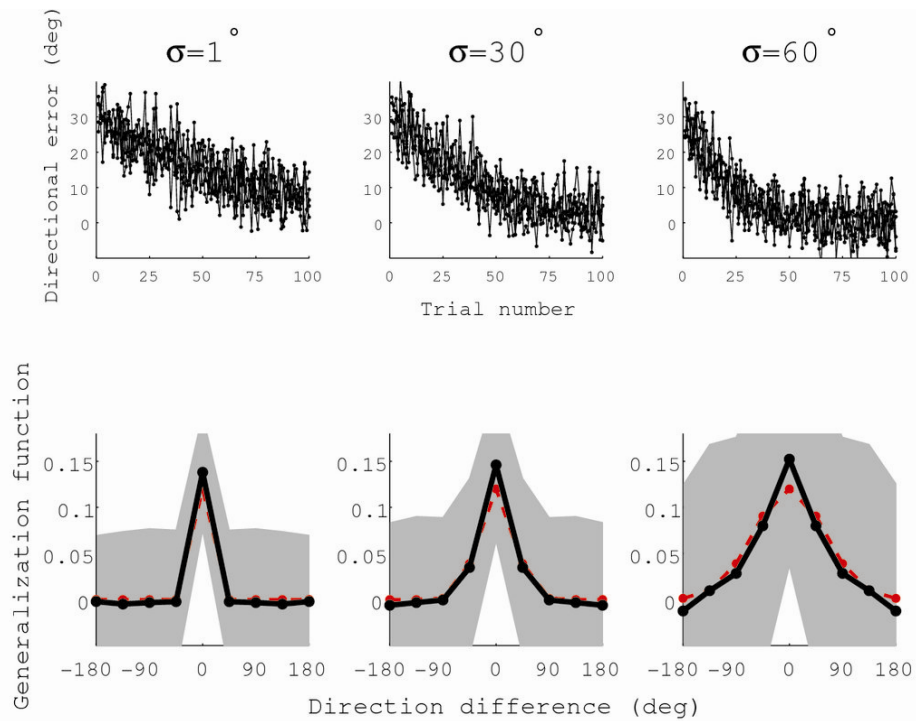

Figure S5:  $\sigma_{proc} = 0.2$  and  $\sigma_{obs} = 4.0$ .

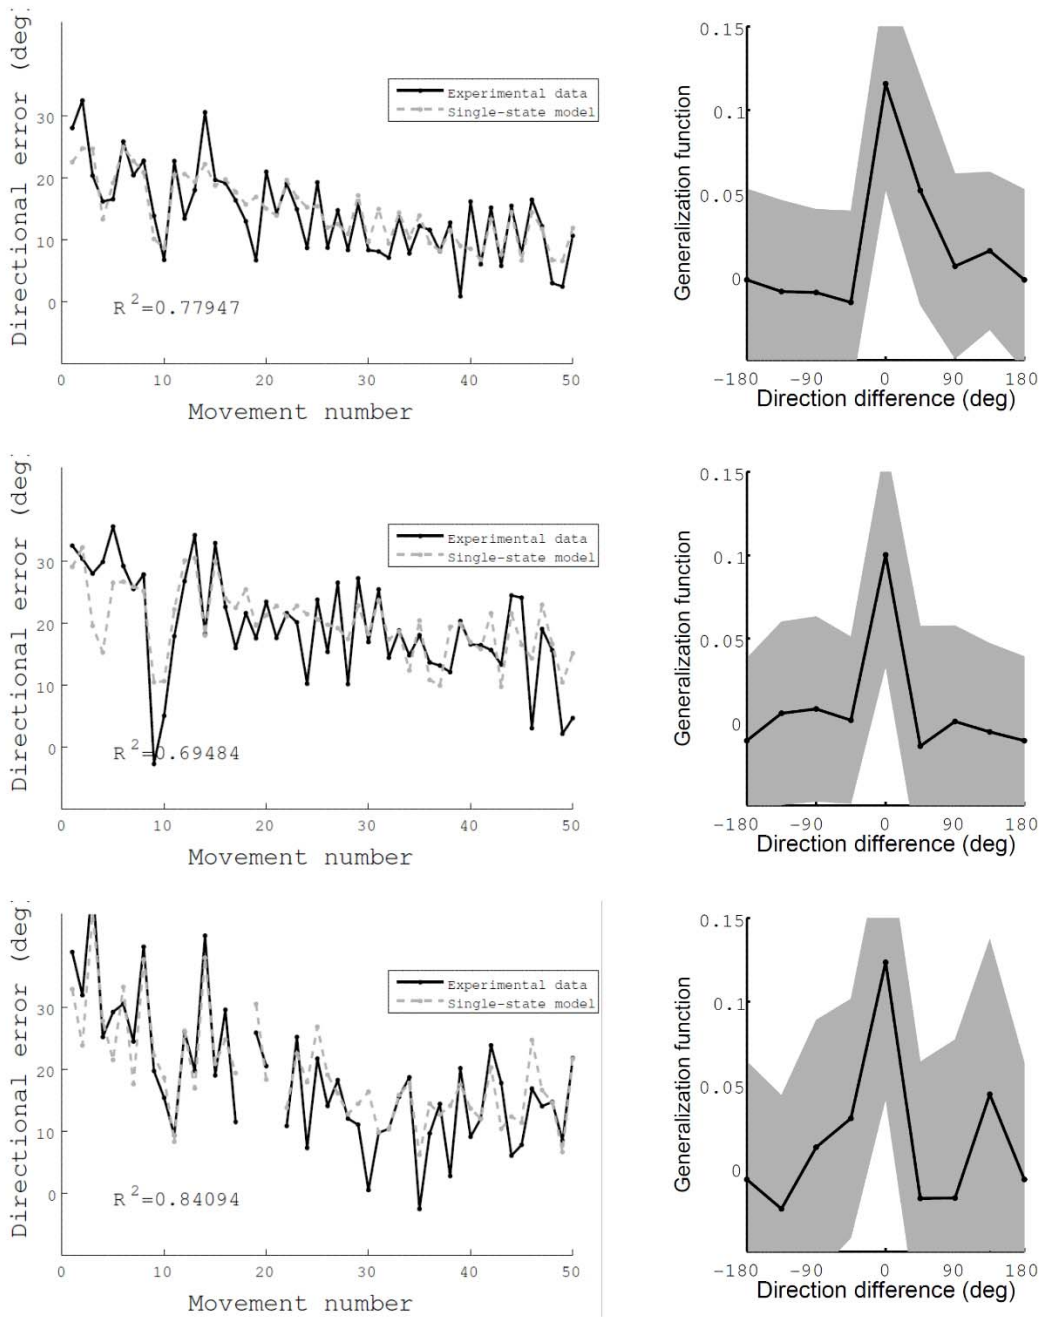

Figure S6: Experimental error data and the state-space model fitting (left column) and corresponding trial-to-trial generalization functions (right column) from three typical participants.
